# Supplementary material for: Development and validation of a prognostic nomogram for adult patients with renal sarcoma: A retrospective study based on the SEER database
Source: Research Square preprint supplement (doi:10.21203/rs.3.rs-1550819/v1), 2022-04-15
Supplement: Supplementary file 1 [file a31a010d959f59fec24414de.xlsx]

## Sheet: Sheet1
Patient_ID	Sex	Age1	Age	Marital_status	Race	Grade	Histological_type	SEER_stage	Surgery	Radiatherapy	Chemotherapy	CSS	Survival_months	OS
2971378	2	61	2	2	1	5	1	2	2	1	2	0	15	1
8473941	1	49	1	2	1	5	1	2	1	2	1	0	11	1
8919892	2	69	2	1	1	1	1	2	2	2	2	0	94	0
8951366	1	40	1	2	2	1	1	1	2	2	2	0	92	0
8967912	2	39	1	2	1	5	1	2	2	1	2	0	82	0
8973377	1	59	1	1	1	1	1	1	2	2	2	0	81	0
9000135	1	52	1	1	1	5	1	1	2	2	2	0	51	1
9506688	2	51	1	2	1	5	1	1	1	2	1	0	11	1
9513565	1	71	2	1	1	3	1	2	2	2	2	0	2	1
14505804	1	39	1	1	1	5	1	3	2	2	2	1	81	1
15047486	2	51	1	1	1	4	1	1	2	1	2	0	31	0
22055677	2	52	1	2	1	5	1	3	2	2	2	0	116	1
22507838	1	65	2	1	1	5	1	1	1	2	2	0	52	0
22531422	2	72	2	2	1	5	1	2	2	2	2	0	21	0
25850101	1	76	2	1	1	4	1	1	2	2	2	0	129	0
26936549	1	57	1	1	1	5	1	3	2	2	2	0	17	1
26996216	1	54	1	2	1	2	1	2	2	2	2	1	19	1
28510438	2	18	1	2	1	5	1	2	2	2	1	0	7	1
31368414	2	37	1	2	2	5	1	1	2	2	2	0	120	0
31982264	2	49	1	1	1	1	1	1	2	1	2	0	12	0
33458442	1	69	2	1	1	4	1	1	2	2	2	0	2	1
38227757	1	65	2	2	1	2	1	1	2	2	2	0	29	1
38897980	1	69	2	1	1	3	1	1	2	2	2	0	41	1
39334913	1	46	1	1	1	2	1	2	1	2	2	0	91	0
40428275	2	64	2	2	1	1	1	1	2	2	2	0	2	1
40503163	1	71	2	1	3	3	1	1	2	2	2	0	4	0
40561747	1	48	1	2	1	5	1	1	2	2	1	0	11	1
40569670	2	38	1	1	1	4	1	2	2	2	2	0	14	0
41021385	1	81	2	2	1	5	1	3	2	2	2	0	9	1
49385391	2	79	2	1	3	5	1	3	1	2	2	1	77	1
49937365	2	36	1	2	1	4	1	3	2	2	1	0	2	1
49955854	1	45	1	1	3	4	1	2	2	2	2	0	18	1
49973311	1	57	1	1	1	1	1	1	2	2	2	0	131	0
50516167	2	75	2	2	1	1	1	3	2	2	2	0	36	1
51508193	2	50	1	1	1	1	1	1	2	2	2	0	102	0
52180783	1	82	2	2	1	5	1	2	1	2	2	0	7	1
53198164	2	21	1	2	1	3	1	1	2	2	2	0	61	0
53721032	2	58	1	1	1	2	1	1	1	2	2	0	54	0
53734620	1	39	1	1	2	3	1	1	2	2	2	0	44	0
53784534	1	48	1	1	1	1	1	1	2	2	2	0	53	0
54342936	2	60	1	1	1	4	1	2	2	1	2	1	28	1
54363234	2	42	1	1	1	4	1	1	2	1	1	1	16	1
54889357	2	75	2	1	1	2	1	1	2	2	1	0	25	0
54919754	1	35	1	2	3	1	1	1	2	2	2	0	14	0
55413731	1	49	1	1	1	1	1	1	2	2	2	0	1	0
55927659	1	36	1	2	1	1	1	1	2	2	2	0	15	0
56594580	2	68	2	1	1	5	1	4	2	2	2	0	15	0
58001689	2	80	2	1	1	5	1	2	2	2	2	1	30	1
58792718	1	58	1	1	1	2	1	1	2	2	2	0	67	1
58861274	2	39	1	1	1	5	1	1	2	2	2	0	75	0
58889904	2	61	2	1	1	2	1	2	2	2	2	0	75	0
59280196	2	22	1	2	1	5	1	2	2	2	2	0	45	0
62105699	2	55	1	2	2	5	1	1	2	2	2	0	98	0
62137565	1	88	2	2	1	2	1	1	2	2	2	0	20	0
62148085	2	56	1	1	1	1	1	1	2	2	2	0	80	0
62743081	2	58	1	1	1	1	1	2	2	2	2	0	20	0
63343078	2	63	2	2	2	1	1	2	2	1	2	0	15	0
70576999	1	85	2	1	1	4	1	1	2	1	2	0	13	1
70581617	1	49	1	1	3	3	1	3	2	2	2	0	30	1
71035121	2	76	2	1	1	5	1	3	2	2	2	0	3	1
71585773	1	61	2	1	1	3	1	2	2	2	2	0	7	1
71623061	2	78	2	2	2	1	1	1	1	2	2	0	103	0
71643621	1	75	2	1	1	1	1	2	2	2	2	0	24	1
73739217	2	70	2	1	1	2	1	1	2	1	2	0	22	0
73760674	1	80	2	1	1	3	1	2	2	2	1	0	3	1
75429254	2	72	2	2	1	5	1	2	2	1	2	0	76	1
76571874	1	60	1	1	1	3	1	2	2	1	2	0	28	1
77121302	1	65	2	1	1	4	1	2	2	2	2	1	39	1
77639740	1	30	1	2	1	5	1	2	1	2	1	0	16	1
3416063	2	67	2	1	1	2	2	2	2	1	2	0	135	0
4018625	1	67	2	2	1	5	2	2	2	1	1	1	18	1
4110597	2	76	2	2	1	3	2	3	1	2	1	0	19	1
8520373	2	77	2	2	1	4	2	2	2	2	2	0	36	1
9497960	2	43	1	2	1	3	2	2	2	2	1	0	14	1
9503074	1	60	1	1	1	5	2	1	2	2	2	1	27	1
14488170	2	52	1	1	1	3	2	2	2	2	2	1	0	1
14496210	2	58	1	1	1	3	2	4	2	2	1	0	82	0
14539733	2	74	2	1	2	5	2	3	2	2	2	0	47	1
14603976	1	48	1	1	1	5	2	3	1	2	1	0	22	1
14644217	1	88	2	2	1	1	2	1	2	2	2	0	25	0
15083769	2	59	1	1	1	3	2	2	2	1	2	0	3	1
16467013	2	48	1	2	3	4	2	3	2	2	2	0	0	1
16544453	1	57	1	1	1	4	2	2	2	2	2	1	19	1
16553499	2	62	2	1	3	5	2	3	1	2	1	0	23	1
19598592	2	51	1	1	1	4	2	3	2	2	1	1	8	1
19644576	2	42	1	1	1	3	2	1	2	2	2	0	122	0
19667291	1	45	1	2	1	5	2	3	2	1	1	0	3	1
20084318	1	54	1	1	1	3	2	1	2	2	2	0	88	0
20188288	2	74	2	1	1	4	2	1	2	2	2	1	14	1
22069533	1	74	2	1	1	5	2	2	2	2	2	0	14	1
22126036	2	83	2	2	1	5	2	2	1	2	2	1	0	1
22512870	1	70	2	1	1	2	2	1	2	2	2	0	47	0
24695270	2	63	2	2	1	5	2	3	1	2	1	0	4	1
25832229	1	69	2	1	2	5	2	2	2	2	2	1	23	1
25843483	2	43	1	2	1	4	2	1	2	2	2	0	132	0
26329217	2	59	1	2	1	5	2	1	2	1	2	0	102	1
26991580	1	63	2	1	1	2	2	3	2	2	2	1	32	1
28994711	1	70	2	1	1	4	2	3	1	2	2	1	2	1
29421824	2	41	1	1	3	4	2	1	2	2	2	0	12	0
31425192	2	69	2	1	2	4	2	2	1	2	2	1	3	1
31430386	1	75	2	1	1	3	2	1	2	2	2	0	76	1
31435895	1	51	1	2	2	5	2	3	1	2	1	1	8	1
31452198	2	47	1	1	2	5	2	3	1	2	1	0	5	1
31989069	2	86	2	2	2	4	2	1	1	2	2	0	18	0
33910696	2	48	1	1	3	2	2	2	2	2	1	0	34	0
37803985	2	55	1	1	3	4	2	1	2	2	2	1	105	1
37834157	2	48	1	2	1	5	2	1	2	2	2	1	97	1
38292836	2	69	2	1	3	4	2	2	2	2	2	1	15	1
38351292	2	60	1	1	3	4	2	1	2	2	2	0	10	0
38366670	1	56	1	2	1	4	2	3	2	2	2	0	41	1
38843655	2	94	2	2	1	4	2	2	2	2	1	1	10	1
38870007	1	74	2	2	1	4	2	2	2	2	2	0	1	1
38876695	2	34	1	1	1	5	2	3	1	2	1	0	30	0
39475785	2	55	1	2	2	2	2	2	2	2	2	0	68	0
39880396	2	61	2	2	1	3	2	3	1	2	2	1	1	1
39896553	2	49	1	1	2	3	2	2	2	2	2	1	56	1
39929689	1	88	2	2	1	5	2	3	1	1	2	1	6	1
39933160	2	49	1	1	3	3	2	1	2	2	2	0	51	0
39969748	2	72	2	2	1	3	2	2	2	2	2	0	14	1
40004020	2	64	2	2	1	3	2	1	2	2	2	0	42	0
40547942	2	76	2	2	2	5	2	1	2	2	2	0	28	0
40556176	2	78	2	1	3	4	2	4	2	2	2	0	6	1
49313231	2	36	1	2	2	2	2	1	2	1	2	0	84	1
49339753	1	85	2	1	1	3	2	1	2	2	2	0	9	1
49347850	2	41	1	1	3	3	2	3	2	2	1	0	11	1
49988314	2	44	1	2	2	5	2	1	2	2	2	0	37	1
49991795	2	60	1	1	1	1	2	1	2	2	1	0	132	0
50006174	2	62	2	2	1	2	2	1	2	2	2	0	125	0
50494270	1	53	1	2	1	4	2	2	2	2	1	0	74	1
51570048	1	59	1	1	1	5	2	3	2	2	2	0	28	1
51600831	2	58	1	1	1	4	2	1	2	2	2	0	17	1
51627203	1	55	1	1	1	4	2	3	1	2	1	0	1	1
52675224	2	49	1	1	1	4	2	3	2	2	1	0	26	0
53838847	1	58	1	1	1	4	2	3	2	2	2	0	38	1
54411838	2	74	2	2	1	3	2	3	2	2	1	0	23	0
54963805	2	67	2	2	1	3	2	1	2	2	2	0	21	0
55460542	2	52	1	1	1	4	2	1	2	2	2	0	12	0
58367226	2	77	2	2	1	5	2	2	2	2	2	0	57	1
58414224	2	69	2	1	1	3	2	1	2	2	2	1	84	1
58823497	2	58	1	2	2	4	2	1	2	2	2	0	86	0
59749385	2	60	1	1	1	5	2	4	1	2	2	1	1	1
60253902	1	57	1	1	1	5	2	3	1	2	1	0	2	1
60845748	2	56	1	1	1	5	2	2	2	2	2	0	11	1
62079506	2	51	1	2	2	3	2	2	2	1	2	0	97	0
62124593	1	55	1	1	1	1	2	2	2	1	2	0	73	0
62644831	2	74	2	2	2	2	2	4	1	2	1	0	76	0
71002643	2	73	2	2	1	1	2	2	2	2	2	0	118	1
71575488	1	49	1	2	1	2	2	1	2	2	2	0	114	0
71681611	2	62	2	2	2	3	2	2	2	2	2	1	80	1
72736141	2	47	1	1	1	2	2	1	2	2	2	0	56	0
73190953	1	43	1	1	1	4	2	3	2	2	1	0	40	1
73329231	2	70	2	1	1	2	2	1	2	2	2	0	27	0
73742078	1	46	1	1	1	5	2	1	2	2	2	0	23	0
73769424	1	77	2	1	1	5	2	3	1	1	2	0	3	1
73803252	1	78	2	2	1	3	2	3	1	2	2	0	0	1
73832784	2	34	1	1	1	2	2	2	2	2	2	0	12	0
75505937	2	50	1	1	1	5	2	1	2	2	2	0	132	0
75956035	2	54	1	1	2	2	2	2	2	2	1	0	29	1
76004360	2	59	1	2	1	4	2	1	2	2	2	0	15	1
76502630	2	80	2	1	1	3	2	1	2	2	2	0	84	0
76513019	1	52	1	1	1	5	2	3	1	2	1	0	4	1
76596597	1	84	2	2	1	4	2	2	2	2	2	0	20	1
77142246	2	56	1	2	1	5	2	3	1	2	1	1	13	1
77224412	2	58	1	2	1	4	2	2	2	2	2	1	8	1
20623160	1	55	1	1	1	5	3	3	1	1	1	1	1	1
27031533	1	69	2	1	1	4	3	3	2	2	2	0	0	1
33426066	1	72	2	1	3	5	3	3	2	2	2	0	5	1
49337745	1	94	2	2	1	3	3	3	2	2	2	1	0	1
49402758	2	61	2	1	1	4	3	3	2	2	2	1	13	1
50445331	1	40	1	2	1	5	3	1	2	2	2	1	17	1
53816183	2	63	2	1	1	5	3	3	1	2	1	1	0	1
54928075	1	53	1	1	1	4	3	1	2	2	2	0	0	0
62692956	1	77	2	2	1	5	3	3	1	2	1	1	16	1
76516089	1	73	2	1	1	3	3	1	2	2	2	1	14	1
49874530	1	67	2	2	1	5	4	1	2	2	2	0	75	1
52067882	2	68	2	1	1	5	4	3	1	2	2	0	0	1
54916557	2	66	2	2	1	4	4	3	2	2	1	1	5	1
73806742	2	39	1	1	1	5	4	2	2	1	1	0	10	1
25776567	1	38	1	2	1	4	5	1	2	2	2	1	144	1
31917366	1	71	2	2	1	5	5	2	1	2	2	0	36	0
33494222	2	60	1	2	1	4	5	3	2	1	2	1	55	1
38324822	1	19	1	2	1	5	5	3	2	1	1	0	132	0
38357299	1	64	2	1	1	3	5	2	2	2	2	1	16	1
38777091	2	76	2	2	1	3	5	1	2	2	2	0	118	0
39387614	2	55	1	1	1	4	5	3	2	2	1	1	23	1
49897020	2	66	2	1	1	4	5	2	2	2	2	0	110	1
49912277	1	78	2	1	1	4	5	3	1	1	1	0	118	1
50547666	1	60	1	1	1	4	5	2	2	2	2	1	21	1
51003804	1	65	2	1	1	4	5	3	2	2	2	1	3	1
51632302	1	52	1	2	1	5	5	3	2	2	1	1	8	1
52600032	1	86	2	1	1	4	5	2	2	2	2	1	23	1
52604765	1	55	1	2	1	4	5	1	1	2	2	1	101	1
52612856	1	63	2	2	1	4	5	2	2	2	2	0	76	0
53287597	2	41	1	2	1	5	5	3	1	2	2	1	0	1
54328278	2	70	2	1	1	4	5	3	2	2	1	1	5	1
54344828	1	63	2	1	1	5	5	2	2	2	2	0	38	0
72192441	2	55	1	2	2	3	5	3	2	2	2	0	5	0
31441584	2	63	2	2	1	5	6	3	2	1	1	1	33	1
62071695	1	56	1	1	1	3	6	2	2	2	1	0	97	0
3525261	1	74	2	2	1	3	7	3	1	2	2	1	8	1
8508767	1	54	1	2	1	5	7	3	1	1	2	1	5	1
19607951	2	37	1	1	1	1	7	1	2	2	2	0	135	0
22040830	1	56	1	1	1	4	7	2	2	2	2	0	20	1
25787411	2	71	2	1	1	5	7	2	2	2	2	1	16	1
26343092	2	85	2	2	1	4	7	3	2	2	2	1	14	1
26998234	1	68	2	1	1	5	7	3	1	1	2	1	2	1
29428391	1	77	2	1	1	3	7	4	1	2	2	1	1	1
30974246	2	52	1	2	2	5	7	2	2	2	1	1	116	1
31361590	1	63	2	2	1	4	7	1	2	1	1	0	125	0
33451000	1	50	1	2	1	5	7	3	1	2	2	0	0	0
38315994	1	46	1	1	2	4	7	3	1	1	1	1	7	1
39333068	1	79	2	1	1	5	7	4	1	2	2	0	0	1
49320643	1	78	2	1	1	5	7	3	1	2	2	1	1	1
49384281	2	40	1	2	1	4	7	2	2	2	2	0	13	1
49912573	2	85	2	2	1	5	7	3	1	2	2	1	0	1
49992594	2	55	1	1	1	4	7	3	2	2	2	0	126	0
50459407	2	73	2	2	1	5	7	4	1	2	2	0	121	0
50513737	2	66	2	1	1	5	7	1	2	2	2	0	116	0
50551018	1	63	2	1	1	4	7	3	2	2	2	1	1	1
51077590	1	32	1	1	2	5	7	3	2	2	1	0	53	1
57982767	2	35	1	1	1	5	7	3	2	2	1	1	11	1
58380424	2	75	2	2	1	5	7	4	1	2	2	1	2	1
59324919	1	56	1	1	1	4	7	3	1	1	1	0	3	1
62102201	2	78	2	2	1	4	7	1	2	2	2	1	3	1
62772496	2	67	2	2	2	5	7	3	1	1	2	1	6	1
63348293	1	60	1	1	1	5	7	2	2	2	2	0	2	1
71670280	1	61	2	1	1	4	7	3	2	2	2	1	1	1
72101607	1	80	2	2	1	4	7	2	2	2	2	1	3	1
72638924	1	50	1	1	3	4	7	3	2	1	2	0	5	0
72666959	2	90	2	2	1	5	7	4	1	2	2	0	0	1
73332652	2	91	2	1	1	4	7	2	2	2	1	1	19	1
77651121	2	87	2	2	1	4	7	3	2	2	2	0	3	1

## Sheet: Train
Patient_ID	Sex	Age1	Age	Marital_status	Race	Grade	Histological_type	SEER_stage	Surgery	Radiotherapy	Chemotherapy	CSS	Survival_months	OS	NomogramOS	NomogramCSS	SEEROS	SEERCSS
16467013	2	48	1	2	3	4	2	3	2	2	2	0	0	1	0.117879	0.311802	0.481178	0.621066
8520373	2	77	2	2	1	4	2	2	2	2	2	0	36	1	-0.424331	-0.212469	-0.0527318	-0.0680621
33451000	1	50	1	2	1	5	7	3	1	2	2	0	0	0	1.0965	1.64391	0.481178	0.621066
50551018	1	63	2	1	1	4	7	3	2	2	2	1	1	1	0.806892	1.11649	0.481178	0.621066
77121302	1	65	2	1	1	4	1	2	2	2	2	1	39	1	0.234082	-0.373407	-0.0527318	-0.0680621
25850101	1	76	2	1	1	4	1	1	2	2	2	0	129	0	-0.308128	-0.897678	-0.586641	-0.757191
51508193	2	50	1	1	1	1	1	1	2	2	2	0	102	0	-0.971642	-0.897678	-0.586641	-0.757191
62743081	2	58	1	1	1	1	1	2	2	2	2	0	20	0	-0.429431	-0.373407	-0.0527318	-0.0680621
72666959	2	90	2	2	1	5	7	4	1	2	2	0	0	1	0.9752	2.16818	1.01509	1.31019
39475785	2	55	1	2	2	2	2	2	2	2	2	0	68	0	-0.424331	-0.212469	-0.0527318	-0.0680621
73332652	2	91	2	1	1	4	7	2	2	2	1	1	19	1	-0.398831	0.145158	-0.0527318	-0.0680621
26998234	1	68	2	1	1	5	7	3	1	1	2	1	2	1	1.0965	1.64391	0.481178	0.621066
49912573	2	85	2	2	1	5	7	3	1	2	2	1	0	1	0.43299	1.64391	0.481178	0.621066
26996216	1	54	1	2	1	2	1	2	2	2	2	1	19	1	0.234082	-0.373407	-0.0527318	-0.0680621
58792718	1	58	1	1	1	2	1	1	2	2	2	0	67	1	-0.308128	-0.897678	-0.586641	-0.757191
58380424	2	75	2	2	1	5	7	4	1	2	2	1	2	1	0.9752	2.16818	1.01509	1.31019
38870007	1	74	2	2	1	4	2	2	2	2	2	0	1	1	0.239182	-0.212469	-0.0527318	-0.0680621
38366670	1	56	1	2	1	4	2	3	2	2	2	0	41	1	0.781392	0.311802	0.481178	0.621066
54916557	2	66	2	2	1	4	4	3	2	2	1	1	5	1	0.128079	0.186614	0.481178	0.621066
49988314	2	44	1	2	2	5	2	1	2	2	2	0	37	1	-0.966542	-0.73674	-0.586641	-0.757191
71623061	2	78	2	2	2	1	1	1	1	2	2	0	103	0	-0.682031	-0.37026	-0.586641	-0.757191
39880396	2	61	2	2	1	3	2	3	1	2	2	1	1	1	0.40749	0.83922	0.481178	0.621066
9506688	2	51	1	2	1	5	1	1	1	2	1	0	11	1	-0.682031	-0.817323	-0.586641	-0.757191
20188288	2	74	2	1	1	4	2	1	2	2	2	1	14	1	-0.966542	-0.73674	-0.586641	-0.757191
31917366	1	71	2	2	1	5	5	2	1	2	2	0	36	0	0.544093	0.797764	-0.0527318	-0.0680621
53816183	2	63	2	1	1	5	3	3	1	2	1	1	0	1	0.41259	0.553095	0.481178	0.621066
39333068	1	79	2	1	1	5	7	4	1	2	2	0	0	1	1.63871	2.16818	1.01509	1.31019
24695270	2	63	2	2	1	5	2	3	1	2	1	0	4	1	0.40749	0.392156	0.481178	0.621066
49897020	2	66	2	1	1	4	5	2	2	2	2	0	110	1	-0.409031	0.270345	-0.0527318	-0.0680621
58861274	2	39	1	1	1	5	1	1	2	2	2	0	75	0	-0.971642	-0.897678	-0.586641	-0.757191
53784534	1	48	1	1	1	1	1	1	2	2	2	0	53	0	-0.308128	-0.897678	-0.586641	-0.757191
53734620	1	39	1	1	2	3	1	1	2	2	2	0	44	0	-0.308128	-0.897678	-0.586641	-0.757191
40004020	2	64	2	2	1	3	2	1	2	2	2	0	42	0	-0.966542	-0.73674	-0.586641	-0.757191
40561747	1	48	1	2	1	5	1	1	2	2	1	0	11	1	-0.308128	-1.34474	-0.586641	-0.757191
62102201	2	78	2	2	1	4	7	1	2	2	2	1	3	1	-0.941042	0.067951	-0.586641	-0.757191
16553499	2	62	2	1	3	5	2	3	1	2	1	0	23	1	0.40749	0.392156	0.481178	0.621066
56594580	2	68	2	1	1	5	1	4	2	2	2	0	15	0	0.65499	0.675134	1.01509	1.31019
76513019	1	52	1	1	1	5	2	3	1	2	1	0	4	1	1.071	0.392156	0.481178	0.621066
26936549	1	57	1	1	1	5	1	3	2	2	2	0	17	1	0.776292	0.150864	0.481178	0.621066
40569670	2	38	1	1	1	4	1	2	2	2	2	0	14	0	-0.429431	-0.373407	-0.0527318	-0.0680621
53287597	2	41	1	2	1	5	5	3	1	2	2	1	0	1	0.42279	1.32203	0.481178	0.621066
62137565	1	88	2	2	1	2	1	1	2	2	2	0	20	0	-0.308128	-0.897678	-0.586641	-0.757191
14644217	1	88	2	2	1	1	2	1	2	2	2	0	25	0	-0.303028	-0.73674	-0.586641	-0.757191
15047486	2	51	1	1	1	4	1	1	2	1	2	0	31	0	-0.971642	-0.897678	-0.586641	-0.757191
38777091	2	76	2	2	1	3	5	1	2	2	2	0	118	0	-0.951242	-0.253925	-0.586641	-0.757191
58823497	2	58	1	2	2	4	2	1	2	2	2	0	86	0	-0.966542	-0.73674	-0.586641	-0.757191
76004360	2	59	1	2	1	4	2	1	2	2	2	0	15	1	-0.966542	-0.73674	-0.586641	-0.757191
72638924	1	50	1	1	3	4	7	3	2	1	2	0	5	0	0.806892	1.11649	0.481178	0.621066
53721032	2	58	1	1	1	2	1	1	1	2	2	0	54	0	-0.682031	-0.37026	-0.586641	-0.757191
19644576	2	42	1	1	1	3	2	1	2	2	2	0	122	0	-0.966542	-0.73674	-0.586641	-0.757191
50459407	2	73	2	2	1	5	7	4	1	2	2	0	121	0	0.9752	2.16818	1.01509	1.31019
50516167	2	75	2	2	1	1	1	3	2	2	2	0	36	1	0.112779	0.150864	0.481178	0.621066
71002643	2	73	2	2	1	1	2	2	2	2	2	0	118	1	-0.424331	-0.212469	-0.0527318	-0.0680621
39969748	2	72	2	2	1	3	2	2	2	2	2	0	14	1	-0.424331	-0.212469	-0.0527318	-0.0680621
31425192	2	69	2	1	2	4	2	2	1	2	2	1	3	1	-0.13472	0.314949	-0.0527318	-0.0680621
71035121	2	76	2	1	1	5	1	3	2	2	2	0	3	1	0.112779	0.150864	0.481178	0.621066
73190953	1	43	1	1	1	4	2	3	2	2	1	0	40	1	0.781392	-0.135262	0.481178	0.621066
49385391	2	79	2	1	3	5	1	3	1	2	2	1	77	1	0.40239	0.678282	0.481178	0.621066
8967912	2	39	1	2	1	5	1	2	2	1	2	0	82	0	-0.429431	-0.373407	-0.0527318	-0.0680621
71575488	1	49	1	2	1	2	2	1	2	2	2	0	114	0	-0.303028	-0.73674	-0.586641	-0.757191
59324919	1	56	1	1	1	4	7	3	1	1	1	0	3	1	1.0965	1.19685	0.481178	0.621066
73832784	2	34	1	1	1	2	2	2	2	2	2	0	12	0	-0.424331	-0.212469	-0.0527318	-0.0680621
62644831	2	74	2	2	2	2	2	4	1	2	1	0	76	0	0.949701	0.916427	1.01509	1.31019
9000135	1	52	1	1	1	5	1	1	2	2	2	0	51	1	-0.308128	-0.897678	-0.586641	-0.757191
49337745	1	94	2	2	1	3	3	3	2	2	2	1	0	1	0.786492	0.47274	0.481178	0.621066
71670280	1	61	2	1	1	4	7	3	2	2	2	1	1	1	0.806892	1.11649	0.481178	0.621066
49874530	1	67	2	2	1	5	4	1	2	2	2	0	75	1	-0.292828	-0.414864	-0.586641	-0.757191
50445331	1	40	1	2	1	5	3	1	2	2	2	1	17	1	-0.297928	-0.575802	-0.586641	-0.757191
57982767	2	35	1	1	1	5	7	3	2	2	1	1	11	1	0.143379	0.669429	0.481178	0.621066
31441584	2	63	2	2	1	5	6	3	2	1	1	1	33	1	0.138279	0.508491	0.481178	0.621066
54363234	2	42	1	1	1	4	1	1	2	1	1	1	16	1	-0.971642	-1.34474	-0.586641	-0.757191
31361590	1	63	2	2	1	4	7	1	2	1	1	0	125	0	-0.277528	-0.379113	-0.586641	-0.757191
49912277	1	78	2	1	1	4	5	3	1	1	1	0	118	1	1.0863	0.874971	0.481178	0.621066
71643621	1	75	2	1	1	1	1	2	2	2	2	0	24	1	0.234082	-0.373407	-0.0527318	-0.0680621
49402758	2	61	2	1	1	4	3	3	2	2	2	1	13	1	0.122979	0.47274	0.481178	0.621066
49339753	1	85	2	1	1	3	2	1	2	2	2	0	9	1	-0.303028	-0.73674	-0.586641	-0.757191
26329217	2	59	1	2	1	5	2	1	2	1	2	0	102	1	-0.966542	-0.73674	-0.586641	-0.757191
49313231	2	36	1	2	2	2	2	1	2	1	2	0	84	1	-0.966542	-0.73674	-0.586641	-0.757191
33458442	1	69	2	1	1	4	1	1	2	2	2	0	2	1	-0.308128	-0.897678	-0.586641	-0.757191
50513737	2	66	2	1	1	5	7	1	2	2	2	0	116	0	-0.941042	0.067951	-0.586641	-0.757191
72192441	2	55	1	2	2	3	5	3	2	2	2	0	5	0	0.133179	0.794616	0.481178	0.621066
58414224	2	69	2	1	1	3	2	1	2	2	2	1	84	1	-0.966542	-0.73674	-0.586641	-0.757191
19598592	2	51	1	1	1	4	2	3	2	2	1	1	8	1	0.117879	-0.135262	0.481178	0.621066
49937365	2	36	1	2	1	4	1	3	2	2	1	0	2	1	0.112779	-0.2962	0.481178	0.621066
22507838	1	65	2	1	1	5	1	1	1	2	2	0	52	0	-0.0185173	-0.37026	-0.586641	-0.757191
49347850	2	41	1	1	3	3	2	3	2	2	1	0	11	1	0.117879	-0.135262	0.481178	0.621066
77639740	1	30	1	2	1	5	1	2	1	2	1	0	16	1	0.523693	-0.293053	-0.0527318	-0.0680621
73806742	2	39	1	1	1	5	4	2	2	1	1	0	10	1	-0.414131	-0.337657	-0.0527318	-0.0680621
8508767	1	54	1	2	1	5	7	3	1	1	2	1	5	1	1.0965	1.64391	0.481178	0.621066
22126036	2	83	2	2	1	5	2	2	1	2	2	1	0	1	-0.13472	0.314949	-0.0527318	-0.0680621
63348293	1	60	1	1	1	5	7	2	2	2	2	0	2	1	0.264682	0.592222	-0.0527318	-0.0680621
9503074	1	60	1	1	1	5	2	1	2	2	2	1	27	1	-0.303028	-0.73674	-0.586641	-0.757191
15083769	2	59	1	1	1	3	2	2	2	1	2	0	3	1	-0.424331	-0.212469	-0.0527318	-0.0680621
31982264	2	49	1	1	1	1	1	1	2	1	2	0	12	0	-0.971642	-0.897678	-0.586641	-0.757191
25776567	1	38	1	2	1	4	5	1	2	2	2	1	144	1	-0.287728	-0.253925	-0.586641	-0.757191
73760674	1	80	2	1	1	3	1	2	2	2	1	0	3	1	0.234082	-0.820471	-0.0527318	-0.0680621
73739217	2	70	2	1	1	2	1	1	2	1	2	0	22	0	-0.971642	-0.897678	-0.586641	-0.757191
49973311	1	57	1	1	1	1	1	1	2	2	2	0	131	0	-0.308128	-0.897678	-0.586641	-0.757191
14505804	1	39	1	1	1	5	1	3	2	2	2	1	81	1	0.776292	0.150864	0.481178	0.621066
30974246	2	52	1	2	2	5	7	2	2	2	1	1	116	1	-0.398831	0.145158	-0.0527318	-0.0680621
38227757	1	65	2	2	1	2	1	1	2	2	2	0	29	1	-0.308128	-0.897678	-0.586641	-0.757191
71681611	2	62	2	2	2	3	2	2	2	2	2	1	80	1	-0.424331	-0.212469	-0.0527318	-0.0680621
29428391	1	77	2	1	1	3	7	4	1	2	2	1	1	1	1.63871	2.16818	1.01509	1.31019
33910696	2	48	1	1	3	2	2	2	2	2	1	0	34	0	-0.424331	-0.659533	-0.0527318	-0.0680621
49992594	2	55	1	1	1	4	7	3	2	2	2	0	126	0	0.143379	1.11649	0.481178	0.621066
19667291	1	45	1	2	1	5	2	3	2	1	1	0	3	1	0.781392	-0.135262	0.481178	0.621066
39896553	2	49	1	1	2	3	2	2	2	2	2	1	56	1	-0.424331	-0.212469	-0.0527318	-0.0680621
77651121	2	87	2	2	1	4	7	3	2	2	2	0	3	1	0.143379	1.11649	0.481178	0.621066
75429254	2	72	2	2	1	5	1	2	2	1	2	0	76	1	-0.429431	-0.373407	-0.0527318	-0.0680621
39929689	1	88	2	2	1	5	2	3	1	1	2	1	6	1	1.071	0.83922	0.481178	0.621066
20623160	1	55	1	1	1	5	3	3	1	1	1	1	1	1	1.0761	0.553095	0.481178	0.621066
40503163	1	71	2	1	3	3	1	1	2	2	2	0	4	0	-0.308128	-0.897678	-0.586641	-0.757191
4110597	2	76	2	2	1	3	2	3	1	2	1	0	19	1	0.40749	0.392156	0.481178	0.621066
51003804	1	65	2	1	1	4	5	3	2	2	2	1	3	1	0.796692	0.794616	0.481178	0.621066
76596597	1	84	2	2	1	4	2	2	2	2	2	0	20	1	0.239182	-0.212469	-0.0527318	-0.0680621
70576999	1	85	2	1	1	4	1	1	2	1	2	0	13	1	-0.308128	-0.897678	-0.586641	-0.757191
19607951	2	37	1	1	1	1	7	1	2	2	2	0	135	0	-0.941042	0.067951	-0.586641	-0.757191
49384281	2	40	1	2	1	4	7	2	2	2	2	0	13	1	-0.398831	0.592222	-0.0527318	-0.0680621
54919754	1	35	1	2	3	1	1	1	2	2	2	0	14	0	-0.308128	-0.897678	-0.586641	-0.757191
54411838	2	74	2	2	1	3	2	3	2	2	1	0	23	0	0.117879	-0.135262	0.481178	0.621066
62071695	1	56	1	1	1	3	6	2	2	2	1	0	97	0	0.259582	-0.0157802	-0.0527318	-0.0680621
62079506	2	51	1	2	2	3	2	2	2	1	2	0	97	0	-0.424331	-0.212469	-0.0527318	-0.0680621
26991580	1	63	2	1	1	2	2	3	2	2	2	1	32	1	0.781392	0.311802	0.481178	0.621066
60845748	2	56	1	1	1	5	2	2	2	2	2	0	11	1	-0.424331	-0.212469	-0.0527318	-0.0680621
31989069	2	86	2	2	2	4	2	1	1	2	2	0	18	0	-0.676931	-0.209321	-0.586641	-0.757191
55927659	1	36	1	2	1	1	1	1	2	2	2	0	15	0	-0.308128	-0.897678	-0.586641	-0.757191
51077590	1	32	1	1	2	5	7	3	2	2	1	0	53	1	0.806892	0.669429	0.481178	0.621066
27031533	1	69	2	1	1	4	3	3	2	2	2	0	0	1	0.786492	0.47274	0.481178	0.621066
3525261	1	74	2	2	1	3	7	3	1	2	2	1	8	1	1.0965	1.64391	0.481178	0.621066
49955854	1	45	1	1	3	4	1	2	2	2	2	0	18	1	0.234082	-0.373407	-0.0527318	-0.0680621
14539733	2	74	2	1	2	5	2	3	2	2	2	0	47	1	0.117879	0.311802	0.481178	0.621066
73769424	1	77	2	1	1	5	2	3	1	1	2	0	3	1	1.071	0.83922	0.481178	0.621066
52604765	1	55	1	2	1	4	5	1	1	2	2	1	101	1	0.00188259	0.273493	-0.586641	-0.757191
8473941	1	49	1	2	1	5	1	2	1	2	1	0	11	1	0.523693	-0.293053	-0.0527318	-0.0680621
22055677	2	52	1	2	1	5	1	3	2	2	2	0	116	1	0.112779	0.150864	0.481178	0.621066
60253902	1	57	1	1	1	5	2	3	1	2	1	0	2	1	1.071	0.392156	0.481178	0.621066
72101607	1	80	2	2	1	4	7	2	2	2	2	1	3	1	0.264682	0.592222	-0.0527318	-0.0680621
54342936	2	60	1	1	1	4	1	2	2	1	2	1	28	1	-0.429431	-0.373407	-0.0527318	-0.0680621
25843483	2	43	1	2	1	4	2	1	2	2	2	0	132	0	-0.966542	-0.73674	-0.586641	-0.757191
54963805	2	67	2	2	1	3	2	1	2	2	2	0	21	0	-0.966542	-0.73674	-0.586641	-0.757191
70581617	1	49	1	1	3	3	1	3	2	2	2	0	30	1	0.776292	0.150864	0.481178	0.621066
58889904	2	61	2	1	1	2	1	2	2	2	2	0	75	0	-0.429431	-0.373407	-0.0527318	-0.0680621
28994711	1	70	2	1	1	4	2	3	1	2	2	1	2	1	1.071	0.83922	0.481178	0.621066
14496210	2	58	1	1	1	3	2	4	2	2	1	0	82	0	0.66009	0.389009	1.01509	1.31019
22531422	2	72	2	2	1	5	1	2	2	2	2	0	21	0	-0.429431	-0.373407	-0.0527318	-0.0680621
59749385	2	60	1	1	1	5	2	4	1	2	2	1	1	1	0.949701	1.36349	1.01509	1.31019
52600032	1	86	2	1	1	4	5	2	2	2	2	1	23	1	0.254482	0.270345	-0.0527318	-0.0680621
50494270	1	53	1	2	1	4	2	2	2	2	1	0	74	1	0.239182	-0.659533	-0.0527318	-0.0680621
54328278	2	70	2	1	1	4	5	3	2	2	1	1	5	1	0.133179	0.347552	0.481178	0.621066
76502630	2	80	2	1	1	3	2	1	2	2	2	0	84	0	-0.966542	-0.73674	-0.586641	-0.757191
52180783	1	82	2	2	1	5	1	2	1	2	2	0	7	1	0.523693	0.154011	-0.0527318	-0.0680621
38897980	1	69	2	1	1	3	1	1	2	2	2	0	41	1	-0.308128	-0.897678	-0.586641	-0.757191
50006174	2	62	2	2	1	2	2	1	2	2	2	0	125	0	-0.966542	-0.73674	-0.586641	-0.757191
54889357	2	75	2	1	1	2	1	1	2	2	1	0	25	0	-0.971642	-1.34474	-0.586641	-0.757191
38292836	2	69	2	1	3	4	2	2	2	2	2	1	15	1	-0.424331	-0.212469	-0.0527318	-0.0680621
31430386	1	75	2	1	1	3	2	1	2	2	2	0	76	1	-0.303028	-0.73674	-0.586641	-0.757191
38876695	2	34	1	1	1	5	2	3	1	2	1	0	30	0	0.40749	0.392156	0.481178	0.621066
39387614	2	55	1	1	1	4	5	3	2	2	1	1	23	1	0.133179	0.347552	0.481178	0.621066
31368414	2	37	1	2	2	5	1	1	2	2	2	0	120	0	-0.971642	-0.897678	-0.586641	-0.757191
22069533	1	74	2	1	1	5	2	2	2	2	2	0	14	1	0.239182	-0.212469	-0.0527318	-0.0680621
55413731	1	49	1	1	1	1	1	1	2	2	2	0	1	0	-0.308128	-0.897678	-0.586641	-0.757191
52675224	2	49	1	1	1	4	2	3	2	2	1	0	26	0	0.117879	-0.135262	0.481178	0.621066

## Sheet: Test
Patient_ID	Sex	Age1	Age	Marital_status	Race	Grade	Histological_type	SEER_stage	Surgery	Radiatherapy	Chemotherapy	CSS	Survival_months	OS	NomogramOS	NomogramCSS	SEEROS	SEERCSS
2971378	2	61	2	2	1	5	1	2	2	1	2	0	15	1	-0.0162973	-0.837782	0.0297466	0.0271777
8919892	2	69	2	1	1	1	1	2	2	2	2	0	94	0	-0.0162973	-0.837782	0.0297466	0.0271777
8951366	1	40	1	2	2	1	1	1	2	2	2	0	92	0	-1.29954	-1.15292	-1.01138	-0.924043
8973377	1	59	1	1	1	1	1	1	2	2	2	0	81	0	-1.29954	-1.15292	-1.01138	-0.924043
9513565	1	71	2	1	1	3	1	2	2	2	2	0	2	1	-0.357307	-0.837782	0.0297466	0.0271777
28510438	2	18	1	2	1	5	1	2	2	2	1	0	7	1	-0.0162973	-0.951399	0.0297466	0.0271777
39334913	1	46	1	1	1	2	1	2	1	2	2	0	91	0	0.458374	0.841501	0.0297466	0.0271777
40428275	2	64	2	2	1	1	1	1	2	2	2	0	2	1	-0.958532	-1.15292	-1.01138	-0.924043
41021385	1	81	2	2	1	5	1	3	2	2	2	0	9	1	0.584927	-0.522648	1.07088	0.978398
53198164	2	21	1	2	1	3	1	1	2	2	2	0	61	0	-0.958532	-1.15292	-1.01138	-0.924043
58001689	2	80	2	1	1	5	1	2	2	2	2	1	30	1	-0.0162973	-0.837782	0.0297466	0.0271777
59280196	2	22	1	2	1	5	1	2	2	2	2	0	45	0	-0.0162973	-0.837782	0.0297466	0.0271777
62105699	2	55	1	2	2	5	1	1	2	2	2	0	98	0	-0.958532	-1.15292	-1.01138	-0.924043
62148085	2	56	1	1	1	1	1	1	2	2	2	0	80	0	-0.958532	-1.15292	-1.01138	-0.924043
63343078	2	63	2	2	2	1	1	2	2	1	2	0	15	0	-0.0162973	-0.837782	0.0297466	0.0271777
71585773	1	61	2	1	1	3	1	2	2	2	2	0	7	1	-0.357307	-0.837782	0.0297466	0.0271777
76571874	1	60	1	1	1	3	1	2	2	1	2	0	28	1	-0.357307	-0.837782	0.0297466	0.0271777
3416063	2	67	2	1	1	2	2	2	2	1	2	0	135	0	0.0245248	-0.46662	0.0297466	0.0271777
4018625	1	67	2	2	1	5	2	2	2	1	1	1	18	1	-0.316485	-0.580236	0.0297466	0.0271777
9497960	2	43	1	2	1	3	2	2	2	2	1	0	14	1	0.0245248	-0.580236	0.0297466	0.0271777
14488170	2	52	1	1	1	3	2	2	2	2	2	1	0	1	0.0245248	-0.46662	0.0297466	0.0271777
14603976	1	48	1	1	1	5	2	3	1	2	1	0	22	1	1.44143	1.41418	1.07088	0.978398
16544453	1	57	1	1	1	4	2	2	2	2	2	1	19	1	-0.316485	-0.46662	0.0297466	0.0271777
20084318	1	54	1	1	1	3	2	1	2	2	2	0	88	0	-1.25872	-0.781754	-1.01138	-0.924043
22512870	1	70	2	1	1	2	2	1	2	2	2	0	47	0	-1.25872	-0.781754	-1.01138	-0.924043
25832229	1	69	2	1	2	5	2	2	2	2	2	1	23	1	-0.316485	-0.46662	0.0297466	0.0271777
29421824	2	41	1	1	3	4	2	1	2	2	2	0	12	0	-0.91771	-0.781754	-1.01138	-0.924043
31435895	1	51	1	2	2	5	2	3	1	2	1	1	8	1	1.44143	1.41418	1.07088	0.978398
31452198	2	47	1	1	2	5	2	3	1	2	1	0	5	1	1.78244	1.41418	1.07088	0.978398
37803985	2	55	1	1	3	4	2	1	2	2	2	1	105	1	-0.91771	-0.781754	-1.01138	-0.924043
37834157	2	48	1	2	1	5	2	1	2	2	2	1	97	1	-0.91771	-0.781754	-1.01138	-0.924043
38351292	2	60	1	1	3	4	2	1	2	2	2	0	10	0	-0.91771	-0.781754	-1.01138	-0.924043
38843655	2	94	2	2	1	4	2	2	2	2	1	1	10	1	0.0245248	-0.580236	0.0297466	0.0271777
39933160	2	49	1	1	3	3	2	1	2	2	2	0	51	0	-0.91771	-0.781754	-1.01138	-0.924043
40547942	2	76	2	2	2	5	2	1	2	2	2	0	28	0	-0.91771	-0.781754	-1.01138	-0.924043
40556176	2	78	2	1	3	4	2	4	2	2	2	0	6	1	1.90899	0.163649	2.11201	1.92962
49991795	2	60	1	1	1	1	2	1	2	2	1	0	132	0	-0.91771	-0.895371	-1.01138	-0.924043
51570048	1	59	1	1	1	5	2	3	2	2	2	0	28	1	0.625749	-0.151485	1.07088	0.978398
51600831	2	58	1	1	1	4	2	1	2	2	2	0	17	1	-0.91771	-0.781754	-1.01138	-0.924043
51627203	1	55	1	1	1	4	2	3	1	2	1	0	1	1	1.44143	1.41418	1.07088	0.978398
53838847	1	58	1	1	1	4	2	3	2	2	2	0	38	1	0.625749	-0.151485	1.07088	0.978398
55460542	2	52	1	1	1	4	2	1	2	2	2	0	12	0	-0.91771	-0.781754	-1.01138	-0.924043
58367226	2	77	2	2	1	5	2	2	2	2	2	0	57	1	0.0245248	-0.46662	0.0297466	0.0271777
62124593	1	55	1	1	1	1	2	2	2	1	2	0	73	0	-0.316485	-0.46662	0.0297466	0.0271777
72736141	2	47	1	1	1	2	2	1	2	2	2	0	56	0	-0.91771	-0.781754	-1.01138	-0.924043
73329231	2	70	2	1	1	2	2	1	2	2	2	0	27	0	-0.91771	-0.781754	-1.01138	-0.924043
73742078	1	46	1	1	1	5	2	1	2	2	2	0	23	0	-1.25872	-0.781754	-1.01138	-0.924043
73803252	1	78	2	2	1	3	2	3	1	2	2	0	0	1	1.44143	1.5278	1.07088	0.978398
75505937	2	50	1	1	1	5	2	1	2	2	2	0	132	0	-0.91771	-0.781754	-1.01138	-0.924043
75956035	2	54	1	1	2	2	2	2	2	2	1	0	29	1	0.0245248	-0.580236	0.0297466	0.0271777
77142246	2	56	1	2	1	5	2	3	1	2	1	1	13	1	1.78244	1.41418	1.07088	0.978398
77224412	2	58	1	2	1	4	2	2	2	2	2	1	8	1	0.0245248	-0.46662	0.0297466	0.0271777
33426066	1	72	2	1	3	5	3	3	2	2	2	0	5	1	0.666572	0.219677	1.07088	0.978398
54928075	1	53	1	1	1	4	3	1	2	2	2	0	0	0	-1.2179	-0.410592	-1.01138	-0.924043
62692956	1	77	2	2	1	5	3	3	1	2	1	1	16	1	1.48225	1.78534	1.07088	0.978398
76516089	1	73	2	1	1	3	3	1	2	2	2	1	14	1	-1.2179	-0.410592	-1.01138	-0.924043
52067882	2	68	2	1	1	5	4	3	1	2	2	0	0	1	1.86409	2.27012	1.07088	0.978398
33494222	2	60	1	2	1	4	5	3	2	1	2	1	55	1	1.08923	0.962002	1.07088	0.978398
38324822	1	19	1	2	1	5	5	3	2	1	1	0	132	0	0.748216	0.848385	1.07088	0.978398
38357299	1	64	2	1	1	3	5	2	2	2	2	1	16	1	-0.194019	0.646868	0.0297466	0.0271777
50547666	1	60	1	1	1	4	5	2	2	2	2	1	21	1	-0.194019	0.646868	0.0297466	0.0271777
51632302	1	52	1	2	1	5	5	3	2	2	1	1	8	1	0.748216	0.848385	1.07088	0.978398
52612856	1	63	2	2	1	4	5	2	2	2	2	0	76	0	-0.194019	0.646868	0.0297466	0.0271777
54344828	1	63	2	1	1	5	5	2	2	2	2	0	38	0	-0.194019	0.646868	0.0297466	0.0271777
22040830	1	56	1	1	1	4	7	2	2	2	2	0	20	1	-0.112375	1.38919	0.0297466	0.0271777
25787411	2	71	2	1	1	5	7	2	2	2	2	1	16	1	0.228635	1.38919	0.0297466	0.0271777
26343092	2	85	2	2	1	4	7	3	2	2	2	1	14	1	1.17087	1.70433	1.07088	0.978398
38315994	1	46	1	1	2	4	7	3	1	1	1	1	7	1	1.64554	3.26999	1.07088	0.978398
49320643	1	78	2	1	1	5	7	3	1	2	2	1	1	1	1.64554	3.38361	1.07088	0.978398
62772496	2	67	2	2	2	5	7	3	1	1	2	1	6	1	1.98655	3.38361	1.07088	0.978398
